# Supplementary material for: Heterochrony repolarized: a phylogenetic analysis of developmental timing in plethodontid salamanders
Source: PubMed Central journal article supplement (PMC4169133; doi:10.1186/2041-9139-5-27), 2014-08-18
Supplement: 2041-9139-5-27-S1.pdf [file 2041-9139-5-27-S1.pdf]

**ADDITIONAL FILE 1: Bonett et al.**

**Taxa, Developmental Data, and Genbank Accession Numbers.**

| <b>Taxon</b>                             | <b>LH</b> | <b>Meta</b> | <b>Mat M</b> | <b>Mat F</b> | <b>References</b>       | <b>Rag1</b> |
|------------------------------------------|-----------|-------------|--------------|--------------|-------------------------|-------------|
| <b>Hemidactyliinae</b>                   |           |             |              |              |                         |             |
| <b>Batrachosepini</b>                    |           |             |              |              |                         |             |
| <i>Batrachoseps attenuatus</i>           | dd        | 2.8         | 30           | 36           | S1-S4                   | JF449382    |
| <b>Bolitoglossini</b>                    |           |             |              |              |                         |             |
| <i>Bolitoglossa rostrata (helmrichi)</i> | dd        | 5.5         | 30           | 42           | S1,S5                   | AY650124    |
| <i>Bolitoglossa subpalmata</i> (sp.)     | dd        | 6.8         | 18           | 36           | S1,S6                   | EU275810    |
| <i>Nyctanolis pernix</i>                 | dd        | -           | -            | -            | S1                      | AY691714    |
| <i>Pseudoeurycea brunnata (rex)</i>      | dd        | 2.5         | 24           | 30           | S1,S7                   | AY650125    |
| <b>Hemidactyliini</b>                    |           |             |              |              |                         |             |
| <i>Hemidactylium scutatum</i>            | bi        | 2.5         | 24           | 24           | S1,S8-S13               | AY691711    |
| <b>Spelerpini</b>                        |           |             |              |              |                         |             |
| <i>Eurycea aquatica</i>                  | bi        | 24          | 24           | 24           | S1,S13,S14              | KF562645    |
| <i>Eurycea bislineata</i>                | bi        | 24          | 36           | 36           | S1,S13,S15-S19          | AY691606    |
| <i>Eurycea chamberlaini</i>              | bi        | -           | -            | -            | S1                      | KF562646    |
| <i>Eurycea chisholmensis</i>             | pd        | -           | -            | -            | S1                      | KF562647    |
| <i>Eurycea cirrigera</i>                 | bi        | -           | -            | -            | S1,S13                  | KF562648    |
| <i>Eurycea guttolineata</i>              | bi        | 5           | 24           | 24           | S1,S13,S21-S23          | KF562651    |
| <i>Eurycea junaluska</i>                 | bi        | 12          | 24           | 24           | S1,S13,S24-S26          | FJ750246    |
| <i>Eurycea latitans</i>                  | pd        | -           | -            | -            | S1                      | KF562652    |
| <i>Eurycea l. longicauda</i>             | bi        | 5           | 29           | 36           | S1,S13,S27              | AY528403    |
| <i>Eurycea l. melanopleura</i>           | bi        | 5           | 16           | 16           | S1,S13,S28              | KF562653    |
| <i>Eurycea lucifuga</i>                  | bi        | 7           | 30           | 30           | S1,S13,S29-S31          | KF562654    |
| <i>Eurycea multiplicata</i> E            | bi        | -           | -            | -            | S1                      | AY691707    |
| <i>Eurycea multiplicata</i> W            | bi        | 8           | 12           | 12           | S1,RMB & MAS pers. obs. | KF562655    |
| <i>Eurycea nana</i>                      | pd        | -           | 8.5          | 8.5          | S1,S32,JF pers. com.    | KF562656    |
| <i>Eurycea neotenes</i>                  | pd        | -           | -            | -            | S1                      | AY650122    |
| <i>Eurycea pterophila</i>                | pd        | -           | -            | -            | S1                      | KF562658    |
| <i>Eurycea quadridigitata</i> E          | bi        | 3           | 8            | 8            | S1,S13,S33              | KF562662    |
| <i>Eurycea quadridigitata</i> E2         | bi        | -           | -            | -            | S1                      | KF562659    |
| <i>Eurycea quadridigitata</i> W          | bi        | 3           | 8            | 8            | S1,SET pers. com.       | KF562660    |
| <i>Eurycea quadridigitata</i> W2         | bi        | -           | -            | -            | S1                      | AY691708    |
| <i>Eurycea rathbuni</i>                  | pd        | -           | 23           | 23           | S1,JF pers. com.        | KF562663    |
| <i>Eurycea sosorum</i>                   | pd        | -           | 11           | 11           | S1,LD & DAC pers. com.  | KF562664    |
| <i>Eurycea spelaea</i> E                 | bi        | -           | -            | -            | S1                      | KF562666    |
| <i>Eurycea spelaea</i> W                 | bi        | 24          | 24           | 24           | S1,S13,S34              | KF562667    |
| <i>Eurycea subfluvicola</i>              | pd        | -           | -            | -            | S1                      | KJ372324    |
| <i>Eurycea tonkawae</i>                  | pd        | -           | 10           | 10           | S1,NFB & AGG pers. com. | KF562668    |

|                                      |    |    |    |    |                         |          |
|--------------------------------------|----|----|----|----|-------------------------|----------|
| <i>Eurycea tridentifera</i>          | pd | -  | -  | -  | S1                      | KF562669 |
| <i>Eurycea troglodytes</i> P         | pd | -  | 24 | 24 | S1,S13,S35              | KF562670 |
| <i>Eurycea troglodytes</i> M         | bi | 24 | 24 | 24 | S1,S13,S36              | KF562672 |
| <i>Eurycea tynerensis</i> P          | pd | -  | 24 | 24 | S1,RMB & MAS pers. obs. | KF562675 |
| <i>Eurycea tynerensis</i> M1         | bi | -  | -  | -  | S1                      | KF562673 |
| <i>Eurycea tynerensis</i> M2         | bi | -  | -  | -  | S1                      | KF562677 |
| <i>Eurycea tynerensis</i> M3         | bi | 10 | 24 | 24 | S1,RMB & MAS pers. obs. | KF562676 |
| <i>Eurycea wallacei</i>              | pd | -  | -  | -  | S1                      | KF562693 |
| <i>Eurycea waterlooensis</i>         | pd | -  | 18 | 18 | S1,LD & DAC pers. com.  | KF562679 |
| <i>Eurycea wilderae</i>              | bi | 12 | 36 | 36 | S1,S13,S24,S37,S38      | KF562680 |
| <i>Gyrinophilus gulolineatus</i>     | pd | -  | -  | -  | S1                      | KF562681 |
| <i>Gyrinophilus p. palleucus</i>     | pd | -  | 24 | 48 | S1,S13,S39              | KF562684 |
| <i>Gyrinophilus p. necturoides</i>   | pd | -  | -  | -  | S1                      | KF562682 |
| <i>Gyrinophilus p. danielsi</i>      | bi | 36 | 36 | 36 | S1,S13,S40,S41          | KF562687 |
| <i>Gyrinophilus p. dunni</i>         | bi | -  | -  | -  | S1                      | KF562688 |
| <i>Gyrinophilus p. porphyriticus</i> | bi | -  | -  | -  | S1                      | KF562689 |
| <i>Gyrinophilus subterraneus</i>     | pd | -  | -  | -  | S1                      | KF562692 |
| <i>Pseudotriton montanus</i>         | bi | 17 | 26 | 48 | S1,S13,S42,S43          | KF562696 |
| <i>Pseudotriton ruber</i>            | bi | 27 | 45 | 60 | S1,S13,S44,S45          | KF562700 |
| <i>Stereochilus marginatus</i>       | bi | 13 | 33 | 37 | S1,S13,S43,S46          | AY691713 |
| <i>Ursplerpes brucei</i>             | bi | -  | -  | -  | S1                      | KF562703 |

## Plethodontinae

### Aneidini

|                         |    |     |    |    |        |          |
|-------------------------|----|-----|----|----|--------|----------|
| <i>Aneides aeneus</i>   | dd | 2.8 | 90 | 96 | S1,S47 | AY691701 |
| <i>Aneides ferreus</i>  | dd | -   | -  | -  | S1     | EU275805 |
| <i>Aneides hardii</i>   | dd | -   | -  | -  | S1     | KC165585 |
| <i>Aneides lugubris</i> | dd | 3   | 36 | 36 | S1,S48 | AY650118 |

### Desmognathini

|                                     |    |     |    |    |                |          |
|-------------------------------------|----|-----|----|----|----------------|----------|
| <i>Desmognathus aeneus</i>          | dd | 1.5 | 24 | 24 | S1,S49,S50     | AY691696 |
| <i>Desmognathus apalachicola</i>    | bi | 9   | 24 | 36 | S1,S50,S51     | KM107911 |
| <i>Desmognathus brimleyorum</i>     | bi | 9   | 36 | 48 | S1,S50,S52     | AY691697 |
| <i>Desmognathus carolinensis</i>    | bi | 4   | 42 | 48 | S1,S50,S53,S54 | KM107912 |
| <i>Desmognathus folkertsi</i>       | bi | 24  | 48 | 60 | S1,S55,S56     | KM107913 |
| <i>Desmognathus fuscus</i>          | bi | 7   | 24 | 36 | S1,S50         | KM107914 |
| <i>Desmognathus marmoratus</i>      | bi | 36  | 48 | 48 | S1,S50,S57,S58 | KM107915 |
| <i>Desmognathus monticola</i>       | bi | 8   | 48 | 60 | S1,S50,S59-S61 | AY691698 |
| <i>Desmognathus ochrophaeus</i>     | bi | 4   | 36 | 36 | S1,S50,S62     | KM107916 |
| <i>Desmognathus ocoee</i>           | bi | 9   | 36 | 36 | S1,S50,S60,S63 | KM107917 |
| <i>Desmognathus organi</i>          | dd | 2.5 | 42 | 42 | S1,S50,S64     | AY691699 |
| <i>Desmognathus quadramaculatus</i> | bi | 24  | 72 | 84 | S1,S50,S58,S65 | AY650117 |
| <i>Desmognathus santeetlah</i>      | bi | 12  | 24 | 36 | S1,S50,S66     | KM107918 |

|                                  |    |    |    |    |                |          |
|----------------------------------|----|----|----|----|----------------|----------|
| <i>Desmognathus welteri</i>      | bi | 20 | 50 | 50 | S1,S50,S67,S68 | KM107919 |
| <i>Phaeognathus hubrichti</i>    | dd | -  | -  | -  | S1             | AY691700 |
| <b>Ensatinini</b>                |    |    |    |    |                |          |
| <i>Ensatina eschscholtzii</i>    | dd | 5  | 36 | 36 | S1,S69         | AY691702 |
| <b>Hydromantini</b>              |    |    |    |    |                |          |
| <i>Hydromantes ambrosii</i>      | dd | -  | -  | -  | S1             | FJ602320 |
| <i>Hydromantes brunus</i>        | dd | -  | -  | -  | S1             | HM797658 |
| <i>Hydromantes flavus</i>        | dd | -  | -  | -  | S1             | FJ602327 |
| <i>Hydromantes genei</i>         | dd | -  | -  | -  | S1             | FJ602340 |
| <i>Hydromantes imperealis</i>    | dd | -  | -  | -  | S1             | FJ602359 |
| <i>Hydromantes italicus</i>      | dd | -  | -  | -  | S1             | FJ602363 |
| <i>Hydromantes platycephalus</i> | dd | -  | -  | -  | S1             | HM797670 |
| <i>Hydromantes shastae</i>       | dd | -  | -  | -  | S1             | HM797671 |
| <i>Hydromantes strinatii</i>     | dd | 9  | 42 | 60 | S70            | FJ602368 |
| <i>Hydromantes supramontis</i>   | dd | -  | -  | -  | S1             | FJ602377 |
| <i>Karsenia koreana</i>          | dd | -  | -  | -  | S1             | AY887135 |
| <b>Plethodontini</b>             |    |    |    |    |                |          |
| <i>Plethodon cinereus</i>        | dd | 2  | 24 | 24 | S1,S71         | AY691703 |
| <i>Plethodon glutinosus</i>      | dd | 2  | 48 | 48 | S1,S72         | DQ995027 |
| <i>Plethodon grobmani</i>        | dd | 2  | 24 | 24 | S1,S72         | DQ995028 |
| <i>Plethodon hoffmani</i>        | dd | 2  | 18 | 28 | S1,S73         | DQ995029 |
| <i>Plethodon kentucki</i>        | dd | 2  | 36 | 48 | S1,S74         | DQ995033 |
| <i>Plethodon larselli</i>        | dd | 2  | 36 | 48 | S1,S75         | DQ995036 |
| <i>Plethodon neomexicanus</i>    | dd | 2  | 24 | 36 | S1,S76         | DQ995044 |
| <i>Plethodon ouachitae</i>       | dd | -  | -  | -  | S1             | AY691704 |
| <i>Plethodon petraeus</i>        | dd | 2  | 36 | 48 | S1,S77         | DQ995049 |
| <i>Plethodon richmondi</i>       | dd | 2  | 36 | 48 | S1,S78         | DQ995051 |
| <i>Plethodon serratus</i>        | dd | 2  | 24 | 24 | S1,S79         | AY691715 |
| <i>Plethodon vandykei</i>        | dd | 2  | 36 | 42 | S1,S80         | AY691715 |
| <i>Plethodon vehiculum</i>       | dd | 2  | 36 | 36 | S1,S81         | AY691716 |
| <i>Plethodon websteri</i>        | dd | 2  | 21 | 21 | S1,S82         | DQ995073 |
| <i>Plethodon wehrlei</i>         | dd | 2  | 48 | 48 | S1,S83         | DQ995075 |
| <i>Plethodon yonahlossee</i>     | dd | -  | -  | -  | S1             | AY691718 |

LH = Life History; dd = direct development; bi = biphasic; pd = paedomorphic;  
 Meta. = metamorphosis; Mat. = maturation. M = Male; F = Female; Ages are in months.  
 AGG = Andrew G. Gluesenkamp, JF = Joe Fries, LD = Laurie Dries, MAS = Michael A. Steffen,  
 NKB = Nathan K. Bendik, RMB = Ronald M. Bonett, SET = Stanley E. Trauth,  
 DAC = Dee Ann Chamberlain

## Supplemental References

- S1. **AmphibiaWeb: Information on amphibian biology and conservation.** [<http://amphibiaweb.org/>]. Berkeley, California. 2014.
- S2. Hendrickson JR: **Ecology and systematics of salamanders on the genus *Batrachoseps*.** *Univ Calif Publ Zool* 1954, **54**:1–46.
- S3. Maiorana VC. **Size and environmental predictability for salamanders.** *Evolution* 1976, **30**:599–613.
- S4. Jockusch EL, Mahoney MJ: **Communal oviposition and lack of parental care in *Batrachoseps nigriventris* (Caudata: Plethodontidae) with a discussion of the evolution of breeding behavior in plethodontid salamanders.** *Copeia* 1997, **1997**:697–705.
- S5. Houck LD: **Reproductive biology of a neotropical salamander, *Bolitoglossa rostrata*.** *Copeia* 1977, **1977**:70–83.
- S6. Houck LD: **Growth rates and age at maturity for the Plethodontid salamander *Bolitoglossa subpalmata*.** *Copeia* 1982, **1982**:474–478.
- S7. Houck LD: **Reproductive patterns in neotropical salamanders.** Dissertation 1977. University of California Berkeley.
- S8. Berger-Bishop LE, Harris RN: **A study of caudal allometry in the salamander *Hemidactylium scutatum* (Caudata: Plethodontidae).** *Herpetologica* 1996, **52**:515–525.
- S9. Blanchard FN: **The life history of the four-toed salamander.** *Am Nat* 1923, **57**:262–268.
- S10. Blanchard FN, Blanchard FC: **Size groups and their characteristics in the salamander *Hemidactylium scutatum* (Schlegel).** *Am Nat* 1931, **65**:149–164.
- S11. O’Laughlin BE, Harris RN: **Models of metamorphic timing: an experimental evaluation with the pond-dwelling salamander *Hemidactylium scutatum* (Caudata: Plethodontidae).** *Oecologia* 2000, **124**:343–350.
- S12. Wood JT: **The nesting of the four-toed salamander, *Hemidactylium scutatum* (Schlegel), in Virginia.** *Am Midl Nat* 1955, **53**:381–389.
- S13. Ryan TJ, Bruce RC: **Life history evolution and adaptive radiation of hemidactyliine salamanders.** In *The biology of plethodontid salamanders*. Edited by: Bruce RC, Jaeger RG, Houck LD. New York: Kluwer Academic, Plenum Publishers; 2000:303–325.
- S14. Rose FL, Bush FM: **A new species of *Eurycea* (Amphibia: Caudata) from the southeastern United States.** *Tulane Stud. Zool.* 1963, **10**:121–128.
- S15. Trapido H, Clausen RT: **The larvae of *Eurycea bislineata major*.** *Copeia* 1940, **1940**:244–246.
- S16. Hudson RG: **Observations on the larvae of the salamander *Eurycea bislineata bislineata*.** *Herpetologica* 1955, **11**:202–204.
- S17. Stewart MM. **Population dynamics of *Eurycea bislineata* in New York.** *J Herpetol* 1968, **2**:176–177. Sever DM. *Eurycea bislineata*. pp. 683.1–683.5. 1999. Catalogue of American Amphibians and Reptiles. Society for the Study of Amphibians and Reptiles, St. Louis, Missouri.
- S18. Bahret R: **Ecology of lake dwelling *Eurycea bislineata* in the Shawangunk Mountains, New York.** *J Herpetol* 1996, **30**:399–401.

- S19. Sever DM: ***Eurycea bislineata***. pp. 683.1–683.5. 1999. Catalogue of American Amphibians and Reptiles. Society for the Study of Amphibians and Reptiles, St. Louis, Missouri.
- S20. Gordon RE: **A population of Holbrook's salamander, *Eurycea longicauda guttolineata* (Holbrook)**. *Tulane Stud Zool* 1953, **1**:55–60.
- S21. Bruce RC: **The larval life of the three-lined salamander, *Eurycea longicauda guttolineata***. *Copeia* 1970, **1970**:776–779.
- S22. Marshall JL: **The life-history traits of *Eurycea guttolineata* (Caudata, Plethodontidae), with implications for life-history evolution**. *Alytes* 1999, **16**:97–110.
- S23. Freeman SL, Bruce RC: **Larval period and metamorphosis of the three-lined salamander, *Eurycea guttolineata* (Amphibia: Plethodontidae), in the Chattooga River watershed**. *Am Midl Nat* 2001, **145**:194–200.
- S24. Bruce RC: **Egg-laying, larval periods and metamorphosis of *Eurycea bislineata* and *E. junaluska* at Santeetlah Creek, North Carolina**. *Copeia* 1982, **1982**:755–762.
- S25. Sever DM: **Observations on the distribution and reproduction of the salamander *Eurycea junaluska* in Tennessee**. *J Tenn Acad Sci* 1983, **58**:48–50.
- S26. Ryan TJ: **Larval life history and abundance of a rare salamander, *Eurycea junaluska***. *J Herpetol* 1998, **32**:10–17.
- S27. Anderson JD, Martino PJ: **The life history of *Eurycea l. longicauda* associated with ponds**. *Am Midl Nat* 1966, **75**:257–279.
- S28. Ireland PH: **Reproduction and larval development of the dark-sided salamander, *Eurycea longicauda melanopleura***. *Herpetologica* 1974, **30**:338–343.
- S29. Banta AM, McAtee WL: **The life history of the cave salamander, *Spelerpes maculicaudus* (Cope)**. *Proc US Nat Mus* 1906, **1443**:67–83.
- S30. Hutchison VH: **Notes on the plethodontid salamanders, *Eurycea lucifuga* (Rafinesque) and *Eurycea longicauda longicauda* (Green)**. *Occasional Papers of the National Spelerological Society* 1956, **3**:1–24.
- S31. Clergue-Gazeau M, Thorn R: ***Eurycea lucifuga* urodela plethodontidae reproduction and development under artificial breeding conditions**. *Annales de Speleologie* 1976, **31**:169–174.
- S32. Tupa DD, Davis WK: **Populations dynamics of the San Marcos Salamander, *Eurycea nana* Bishop**. *Tex J Sci* 1976, **27**:179–195.
- S33. Semlitsch RD: **Growth and metamorphosis of larval dwarf salamanders (*Eurycea quadradigitata*)**. *Herpetologica* 1980, **36**:138–140.
- S34. Fenolio DB, Niemiller ML, Bonett RM, Graening GO, Collier BA, Stout JF: **Life history, demography, and the influence of cave-roosting bats on a population of the Grotto Salamander (*Eurycea spelaea*) from the Ozark Plateau of Oklahoma (Caudata: Plethodontidae)**. *Herp Con Biol* in press.
- S35. Bruce RC: **Population structure, life history and evolution of paedogenesis in the salamander *Eurycea neotenes***. *Copeia* 1976, **1976**:242–249.

- S36. Sweet SS: **Natural metamorphosis in *Eurycea neotenes*, and the generic allocation of the Texas *Eurycea* (Amphibia: Plethodontidae).** *Herpetologica* 1977, **33**:364-375.
- S37. Bruce RC: **Larval periods and metamorphosis in two species of salamanders of the genus *Eurycea*.** *Copeia* 1982, **1982**:117-127.
- S38. Bruce RC: **An ecological life table for the salamander *Eurycea wilderae*.** *Copeia* 1988, **1988**:15-26.
- S39. Dent JN, Kirby-Smith JS: **Metamorphic Physiology and Morphology of the Cave Salamander *Gyrinophilus palleucus*.** *Copeia* 1963, **1963**:119-130.
- S40. Bruce RC: **Variation in the life cycle of the salamander *Gyrinophilus porphyriticus*.** *Herpetologica* 1972, **28**:230-245.
- S41. Bruce RC: **Life-history patterns of the salamander *Gyrinophilus porphyriticus* in the Cowee Mountains, North Carolina.** *Herpetologica* 1978, **34**:53-64.
- S42. Bruce RC: **Reproductive biology of the mud salamander, *Pseudotriton montanus*, in Western South Carolina.** *Copeia* 1975, **1975**:129-137.
- S43. Bruce RC: **Life-history aspects of *Stereochilus marginatus*, with a comparison of larval development in syntopic *S. marginatus* and *Pseudotriton montanus* (Amphibia:Plethodontidae).** *Southeastern Nat* 2008, **7**:705-716.
- S44. Bruce RC: **The larval life of the red salamander, *Pseudotriton ruber*.** *J Herpetol* 1972, **6**:43-51.
- S45. Bruce RC: **Reproductive biology of the salamander *Pseudotriton ruber* in the southern Blue Ridge Mountains.** *Copeia* 1978, **1978**:417-423.
- S46. Bruce RC: **Life cycle and population structure of the salamander *Stereochilus marginatus* in North Carolina.** *Copeia* 1971, **1971**:234-246.
- S47. Waldron JL, Pauley TK: **Green salamander (*Aneides aeneus*) growth and age at reproductive maturity.** *J Herpetol* 2007, **41**:638-644.
- S48. Lee DE, Bettaso JB, Bond ML, Bradley RW, Tietz JR, Warzybok PM: **Growth, age at maturity, and age-specific survival of the arboreal salamander.** *J Herpetol* 2012, **46**:64-71.
- S49. Harrison JR: **Observations on the life history, ecology and distribution of *Desmognathus aeneus aeneus*.** *Am Midl Nat* 1967, **77**:356-370.
- S50. Tilley SG, Bernardo J: **Life history evolution in plethodontid salamanders.** *Herpetologica* 1993, **49**:154-163.
- S51. Means BD, Karlin AA: **A new species of *Desmognathus* from the eastern Gulf Coastal Plain.** *Herpetologica* 1989, **45**:37-46.
- S52. Means DB: 1975. **Evolutionary ecology studies on salamanders of the genus *Desmognathus*. Part I: Competitive exclusion along a habitat gradient between two species of salamanders (*Desmognathus*) in western Florida; Part II: Life history, growth and body size variation in populations of a streamside salamander (*Desmognathus brimleyorum*) on adjacent mountains.** Ph.D. dissertation. Florida State University, Tallahassee, Florida.
- S53. Tilley SG: **Life histories and natural selection in populations of the salamander *Desmognathus ochrophaeus*.** *Ecology* 1973, **54**:3-17.
- S54. Organ JA: **Studies of the local distribution, life history, and population dynamics of the salamander genus *Desmognathus* in Virginia.** *Ecological Monographs* 1961, **31**:189-220.

- S55. Camp CD, Tilley SG, Austin Jr RM, Marshall JL: **A new species of black-bellied salamander (genus *Desmognathus*) from the Appalachian Mountains of Georgia.** *Herpetologica* 2002, **58**:471–484.
- S56. Camp CD, Marshall JL: **Reproductive life history of *Desmognathus folkertsi* (Dwarf Black-bellied Salamander).** *Southeastern Nat* 2006, **5**:669–684.
- S57. Martof BS: Some aspects of the life history and ecology of the salamander ***Leurognathus marmoratus*.** *Am Midl Nat* 1962, **67**:1–35.
- S58. Bruce RC: **Larval periods, population structure and the effects of stream drift in larvae of the salamanders *Desmognathus quadramaculatus* and *Leurognathus marmoratus* in a southern appalachian stream.** *Copeia* 1985, **1985**:847–854.
- S59. Juterbock EJ: **Sexual dimorphism and maturity characteristics of three species of *Desmognathus* (Amphibia, Urodela, Plethodontidae).** *J Herpetol* 1978, **12**:217–230.
- S60. Bruce RC: **An explanation for differences in body size between two desmognathine salamanders.** *Copeia* 1990, **1990**:1–9.
- S61. Bruce RC, Castanet J, Francillon-Vieillot H: **Skeletochronological analysis of variation in age structure, body size, and life history in three species of desmognathine salamanders.** *Herpetologica* 2002, **58**:181–193.
- S62. Keen WH, Orr LP: **Reproductive cycle, growth, and maturation of northern female *Desmognathus ochrophaeus*.** *J Herpetol* 1980, **14**:7–10.
- S63. Tilley SG: **Life histories and comparative demography of two salamander populations.** *Copeia* 1980, **1980**:806–821.
- S64. Organ JA: **Life history of the Pigmy Salamander, *Desmognathus wrighti*, in Virginia.** *Am Midl Nat* 1961, **66**:384–390.
- S65. Bruce RC: **Life history variation in the salamander *Desmognathus quadramaculatus*.** *Herpetologica* 1988, **44**:218–227.
- S66. Jones RL: **Reproductive biology of *Desmognathus fuscus* and *Desmognathus santeetlah* in the Unicoi Mountains.** *Herpetologica* 1986, **42**:323–334.
- S67. Juterbock EJ: **Evidence for the recognition of specific status for *Desmognathus walteri*.** *J Herpetol* 1984, **18**:240–255.
- S68. Juterbock EJ: **Sexual dimorphism and maturation characteristics of three species of *Desmognathus* (Amphibia, Urodela, Plethodontidae).** *J Herpetol* 1978, **12**:217–230.
- S69. Stebbins RC: **Natural history of the salamanders of the plethodontid genus *Ensatina*.** *Univ Calif Publ Zool* 1954, **54**:47–124.
- S70. Salvidio S: **Life history of the european plethodontid salamander *Speleomantes ambrosii* (Amphibia, Caudata).** *Herpetol J.* 1993 **3**:55–59.
- S71. Saylor A: **The reproductive ecology of the Red-Backed Salamander, *Plethodon cinereus*, in Maryland.** *Copeia* 1966, **1966**:183–193.
- S72. Highton R: **Geographic variation in the life history of the Slimy Salamander.** *Copeia* 1962, **1962**:597–613.
- S73. Angle JP: **The Reproductive Cycle of the Northern Ravine Salamander, *Plethodon richmondi richmondi*, in the Valley and Ridge Province of Pennsylvania and Maryland.** *J Wash Acad Sci* 1969, **59**:192–202.

- S74. Marvin GA: **Life history and population characteristics of the salamander *Plethodon kentucki* with a review of *Plethodon* life histories.** *Am Midl Nat* 1996, **136**:385–400.
- S75. Herrington RE, Larson JH: **Reproductive biology of the Larch Mountain Salamander (*Plethodon larselli*).** *J Herpetol* 1987, **21**:48–56.
- S76. Reagan DP: **Ecology and distribution of the Jemez Mountains Salamander, *Plethodon neomexicanus*.** *Copeia* 1972, **1972**:486–492.
- S77. Jensen JB, Camp CD, Marshall JL: **Ecology and life history of the Pigeon Mountain Salamander.** *Southeastern Nat* 2002, **1**:3–16.
- S78. Nagel JW: **Life history of the ravine salamander (*Plethodon richmondii*) in northeastern Tennessee.** *Herpetologica* 1979, **35**:38–43.
- S79. Herbeck LA, Semlitsch RD: **Life history and ecology of the Southern Redback Salamander, *Plethodon serratus*, in Missouri.** *J Herpetol* 2000, **34**:341–347.
- S80. Lynch JE: **Reproductive ecology of *Plethodon idahoensis*.** MS Thesis 1984, University of Idaho.
- S81. Peacock RL, Nussbaum RA: **Reproductive biology and population structure of the Western Red-Backed Salamander, *Plethodon vehiculum* (Cooper).** *J Herpetol* 1973, **7**:215–224.
- S82. Semlitsch RD, West CA: **Aspects of the life history and ecology of Webster's Salamander, *Plethodon websteri*.** *Copeia* 1983, **1983**:339–346.
- S83. Hall RJ, Stafford DP: **Studies in the life history of Wehrle's Salamander, *Plethodon wehrlei*.** *Herpetologica* 1972, **28**:300–309.
