# Supplementary material for: Heterochrony repolarized: a phylogenetic analysis of developmental timing in plethodontid salamanders
Source: PubMed Central journal article supplement (PMC4169133; doi:10.1186/2041-9139-5-27), 2014-08-18
Supplement: 2041-9139-5-27-S3.pdf [file 2041-9139-5-27-S3.pdf]

**ADDITIONAL FILE 3: Bonett et al.**

**Models applied to each data partition for Bayesian phylogenetic analyses and divergence time estimation.**

| <b>Gene/partition</b>                      | <b># of positions<br/>in partition</b> | <b>Substitution<br/>model</b> | <b>Rates</b> |
|--------------------------------------------|----------------------------------------|-------------------------------|--------------|
| <i>Rag1</i> : alignment pos 1, codon pos 1 | 345                                    | GTR                           | gamma        |
| <i>Rag1</i> : alignment pos 2, codon pos 2 | 344                                    | HKY                           | I + gamma    |
| <i>Rag1</i> : alignment pos 3, codon pos 3 | 344                                    | GTR                           | gamma        |

GTR = general time reversible model. HKY = Hasegawa-Kishino-Yano model. I = proportion of invariant sites. Total fragment length for *Rag1* = 1,033 bp.
