# Supplementary material for: Heterochrony repolarized: a phylogenetic analysis of developmental timing in plethodontid salamanders
Source: PubMed Central journal article supplement (PMC4169133; doi:10.1186/2041-9139-5-27), 2014-08-18
Supplement: 2041-9139-5-27-S6.pdf [file 2041-9139-5-27-S6.pdf]

**ADDITIONAL FILE 6: Bonett et al.**

**Timing of metamorphosis and maturation for select plethodontid nodes as a continuous trait.**

| <b>Node</b>    | <b>Met average</b> | <b>Met 95% HPD</b> | <b>Male Mat average</b> | <b>Male Mat 95% HPD</b> | <b>Female Mat average</b> | <b>Female Mat 95% HPD</b> |
|----------------|--------------------|--------------------|-------------------------|-------------------------|---------------------------|---------------------------|
| <b>Root:</b>   | 7.6                | 1.0 – 14.1         | 31.7                    | 15.2 – 48.3             | 34.0                      | 22.9 – 52.9               |
| <b>Node A:</b> | 16.0               | 7.1 – 25.1         | 30.9                    | 11.9 – 51.7             | 34.6                      | 17.9 – 52.3               |
| <b>Node B:</b> | 12.4               | 5.4 – 18.5         | 19.9                    | 6.4 – 33.6              | 19.2                      | 7.9 – 30.5                |
| <b>Node C:</b> | 11.8               | 5.5 – 19.5         | 15.8                    | 2.0 – 29.1              | 18.2                      | 7.2 – 30.9                |
| <b>Node D:</b> | -                  | -                  | 14.8                    | 3.9 – 25.6              | 15.6                      | 4.7 – 26.2                |
| <b>Node E:</b> | -                  | -                  | 15.9                    | 7.7 – 23.8              | 16.5                      | 7.7 – 25.4                |

Bayesian ancestral state reconstructions of minimum metamorphic age, minimum male maturation, and minimum female maturation at the root (Plethodontidae) and five other key nodes in the tree (Figures 3, 5, and 6). Analysis is based on continuous reconstruction under Brownian Motion in BayesTraits. Averages and 95% highest prior density for each character at each node were calculated in Tracer. Met = Metamorphosis; Mat = Maturation; hyphen (-) = nodes not present in analysis.
